# Supplementary material
Source: publisher figshare collection journal article supplement (https://tandf.figshare.com/articles/dataset/_/6635450)
Supplement: Supplementary file 1 [file 1]

### Supplementary Data: pH Stability Studies of TDF

In this study we evaluated the stability of TDF at pH 7. The pH 7 phosphate buffer was prepared as per the procedure given in United States pharmacopoeia. A 25 mL solution of 2 ppm of TDF was prepared ( $n = 3$ ) in the pH 7 buffer and kept at 37 °C. A 500  $\mu$ L of sample was collected at 0, 0.5, 1, 6, 12 and 24 hours and analysed immediately in HPLC-PDA. The samples were analysed for TDF with the help of Spincotech C18G enabled column (250  $\times$  4.6 mm, 5  $\mu$ m, Spinco Biotech Pvt Ltd, TN, India). The mobile phase used comprised of 10 mM ammonium acetate buffer (pH 4.0  $\pm$  0.1, adjusted with glacial acetic acid) and methanol in the ratio of 50:50 v/v. The flow rate was set to 1 mL min<sup>-1</sup>, the injection volume was 50  $\mu$ L and the samples were monitored at a wavelength of 260 nm.

The observed concentrations of TDF and the %drug remaining at different time points are shown in table 1 and the corresponding chromatograms are shown in Figure 1. It can be observed that until 6 hours the level of degradation is not more than 5%. However after 24 hours a considerable amount of degradation was observed.

Table 1: Concentration of TDF in pH 7.0 buffer at different time points

| Time (h) | Concentration (ng/mL) $\pm$ SD | %RSD | %Bias  | % Drug Remaining |
|----------|--------------------------------|------|--------|------------------|
| 0        | 2014.13 $\pm$ 23               | 1.18 | -0.60  | 100              |
| 0.5      | 2009.56 $\pm$ 24               | 1.22 | 1.72   | 99.7             |
| 1        | 1999.46 $\pm$ 49               | 2.49 | -0.83  | 99.2             |
| 6        | 1917.78 $\pm$ 21               | 1.09 | -4.86  | 95.2             |
| 12       | 1826.54 $\pm$ 20               | 1.14 | -7.69  | 90.7             |
| 24       | 1727.56 $\pm$ 25               | 1.48 | -13.37 | 85.7             |

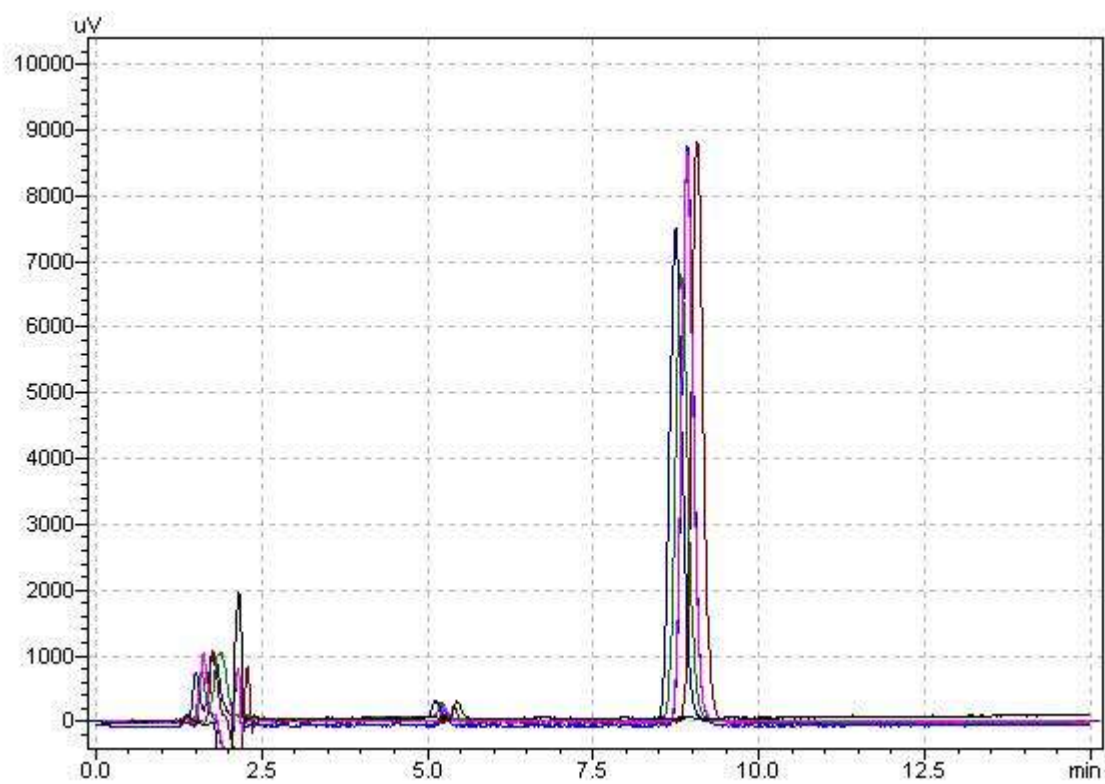

Figure 1: Overlay of chromatograms of TDF at all the time points with blank (**Rt: 8 min**)
